# Supplementary material for: Alx4 relays sequential FGF signaling to induce lacrimal gland morphogenesis
Source: PubMed Central journal article supplement (PMC5656309; doi:10.1371/journal.pgen.1007047), 2017-10-13

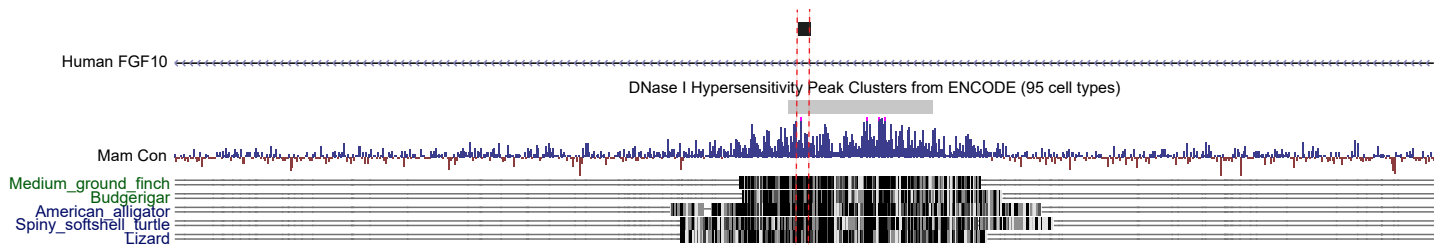

Supplement: pgen.1007047.s004.pdf [file pgen.1007047.s004.pdf]
